# Supplementary material
Source: PubMed Central journal article supplement (PMC10523842)
Supplement: NIHMS1890098-supplement-1.pdf [file NIHMS1890098-supplement-1.pdf]

Amivantamab Supplementary table

**Table 1: Exploratory analysis of ORR by clinical and demographic subgroups**

| Characteristics                 | Responders | Response Rate (95% CI) |
|---------------------------------|------------|------------------------|
| <b>Age</b>                      |            |                        |
| ≥65 (n=33)                      | 11         | 33 (18, 52)            |
| <65 (n=48)                      | 21         | 44 (29, 59)            |
| <b>Sex</b>                      |            |                        |
| Female (n=48)                   | 17         | 35 (22, 51)            |
| Male (n=33)                     | 15         | 45 (28, 64)            |
| <b>Race</b>                     |            |                        |
| White (n=30)                    | 13         | 43 (25, 63)            |
| Black or African American (n=2) | 1          | 50 (1, 99)             |
| Asian (n=40)                    | 17         | 42 (27, 59)            |
| Other (n=9)                     | 1          | 11 (0, 48)             |
| <b>Prior Systemic Therapy</b>   |            |                        |
| Immunotherapy (n=37)            | 17         | 46 (29, 63)            |
| No prior immunotherapy (n=44)   | 15         | 34 (21, 50)            |
| EGFR TKI (n=18)                 | 9          | 50 (26, 74)            |

Source: RYBREVANT approval package (16)
